# Supplementary material for: Kinetic and process modeling of Guerbet coupling chemistry over Cu–Mg–Al mixed oxides
Source: Royal Society of Chemistry journal article supplement (doi:10.1039/d5ey00045a), 2025-01-01
Supplement: d5ey00045a2.xlsx [file d5ey00045a2.xlsx]

## Sheet: Summary
										Pure Ethanol	Cofeed			Pure Ethanol		Cofeed
		Select a compound:	1-butanol						τ (h*kgcat/kmolgas)	1-butanol (M)	1-butanol (M)	Cofeed/Control		τ (h*kgcat/kmolgas)	1-butanol (M)	τ (h*kgcat/kmol gas)	1-butanol (M)	Cofeed/Control
									0	0	4.39139			0	0	0	4.3913
									0.128251	0.000812658	4.11482	0		0.219184	0.121781	0.217498	4.23852	35.6687
									0.149529	0.00156436	4.08012	0		0.474299	0.252513	0.469748	4.1437	16.1174
									0.174338	0.00296474	4.04346	0		1.0013	0.569889	1.00267	4.11689	7.35515
									0.203263	0.00552362	4.00563	0		2.15471	0.931543	2.16613	3.92576	4.18523
									0.236988	0.0100716	3.96767	0		3.38238	1.50143	3.39718	3.89142	2.55445
									0.276308	0.0178807	3.93083	0		4.62977	1.80327	4.61514	3.87517	2.2113
									0.322151	0.0307627	3.89655	0		7.22228	2.1165	7.32097	3.83057	1.75515
									0.3756	0.0510078	3.86619	75.7961		9.91412	1.95331	9.93274	3.63396	1.93242
									0.437918	0.0811341	3.84076	47.3385		15.9262	2.18708	15.7301	3.61232	1.68274
									0.510575	0.123452	3.82093	30.9508		21.6371	2.22746	21.6048	3.42663	1.59438
									0.595286	0.179392	3.80681	21.2205
									0.694053	0.2493	3.79785	15.234
									0.809206	0.332207	3.79325	11.4183
									0.943465	0.426388	3.792	8.89332
									1.1	0.529684	3.79304	7.16094
									1.28251	0.639914	3.79537	5.93107
									1.49529	0.755167	3.79821	5.02962
									1.74338	0.873855	3.80089	4.34957
									2.03263	0.994674	3.80294	3.8233
									2.36988	1.11653	3.80398	3.40696
									2.76308	1.23854	3.80372	3.07114
									3.22151	1.35983	3.80191	2.79587
									3.756	1.47961	3.79834	2.56711
									4.37918	1.59711	3.7928	2.37478
									5.10575	1.71155	3.78509	2.2115
									5.95286	1.82214	3.77501	2.07175
									6.94053	1.92807	3.76233	1.95135
									8.09206	2.02851	3.74682	1.84708
									9.43465	2.12265	3.72825	1.75641
									11	2.20977	3.70638	1.67727
									12.8251	2.28905	3.68097	1.60808
									14.9529	2.35966	3.65177	1.54758
									17.4338	2.42084	3.61856	1.49476
									20.3263	2.47186	3.58113	1.44876
									23.6988	2.51226	3.53928	1.4088

## Sheet: Raw data Cofeed Experiments
	Feed			3´log10(τ)		-1.98764	-0.984405	0.00347108	1.00706	1.59335	1.99256	2.59371	2.99121	3.5902	4.00365
	Ethanol:Butanol			WHSV (galcohol h-1 gcat-1)→	∞	118.616	54.9202	25.73	11.91	7.59414	5.59	3.52394	2.59733	1.64008	1.19412
	70:30 mol%			τ (h*kgcat/kmolgas)→	0	0.217498	0.469748	1.00267	2.16613	3.39718	4.61514	7.32097	9.93274	15.7301	21.6048
		Code		Carbon Balance	1	0.996103	0.984305	0.997533	0.980232	0.973432	0.992225	0.941154	0.979284	0.944412	0.955291
		2		Carbon in Alcohols	1	0.954684	0.904457	0.893008	0.814804	0.786718	0.781605	0.747032	0.717665	0.693608	0.662796
		3		Carbon in Aldehydes	0	0.0366816	0.0718256	0.0921943	0.127313	0.119756	0.13334	0.116918	0.111379	0.0934046	0.0935585
		4		Carbon in Esters	0	0.00117004	0.00456015	0.00699322	0.0291884	0.0518726	0.056914	0.0601963	0.118806	0.129082	0.161912
		8		Carbon in Paraffins	0	0	0	0	0	0	0	0	0	0	0
		7		Carbon in Olefins	0	0	9.24079e-05	0	0.000629027	0.000824505	0.00194133	0.000977684	0.00184383	0.00134816	0.00162991
		6		Carbon in Ketones	0	0.00257522	0.00196414	0.00333022	0.00643785	0.0123906	0.0158888	0.0136096	0.0279249	0.0244023	0.0335444
		5		Carbon in Ethers	0	0.000430481	0.000642872	0.00108988	0.00113819	0.00117229	0.0013536	0.00173403	0.00117916	0.00256678	0.00167159
				Missing Carbon	0	0.00445884	0.0164579	0.00338428	0.0204891	0.0272655	0.00895729	0.0595321	0.0212022	0.055588	0.0448881
				Carbon Explained by modeled species = Normalizing values	1	0.994827	0.982176	0.994352	0.974965	0.966064	0.981378	0.932386	0.965023	0.930678	0.937433
	Included in model?
		Compound	Code	CN	Concentration in the liquid mixture [M]
	No	methanol	2	1	0	0	0	0	0	0	0	0	0	0	0
	No	1-propene	7	4	0	0	0	0	0	0	0.000862995	0	0.00411382	0	0.00133241
	No	1-butene	7	4	0	0	0.000879213	0	0.00407641	0.00490993	0.00642237	0.00551534	0.0063789	0.00760445	0.00690294
	Yes	acetaldehyde	3	2	0	0.267767	0.476298	0.508741	0.70035	0.715725	0.765418	0.545009	0.540997	0.445561	0.393797
	No	1-pentene	7	5	0	0	0	0	0	0	0.00506104	0	0	0	0.00045902
	No	diethyl ether	5	4	0	0	0.00287102	0.0047304	0.00525131	0.0053675	0.00678166	0.00819292	0.00558487	0.0114759	0.00751878
	Yes	ethanol	2	2	10.2464	9.54815	8.54164	8.00054	6.05003	5.53107	5.40712	4.36184	4.12327	3.67893	3.2028
	No	2-propanol	2	3	0	0	0	0	0	0.00391596	0.00416919	0	0.010636	0.0128956	0.0179646
	Yes	acetone	6	3	0	0.0300086	0.0188346	0.0269711	0.0225534	0.0381136	0.0605858	0.0372252	0.0809171	0.0576089	0.0678318
	No	1-hexene	7	6	0	0	0	0	0.0012723	0.00195654	0.00241539	0.00252455	0.00316718	0.00348172	0.00370521
	Yes	butyraldehyde	3	4	0	0.192246	0.372466	0.502618	0.659099	0.602142	0.702693	0.57583	0.586238	0.466706	0.485026
	Yes	ethyl acetate	4	4	0	0.00538756	0.0156338	0.021838	0.0629953	0.109024	0.107333	0.0941974	0.175954	0.17168	0.177923
	No	2-butanol	2	4	0	0	0	0	0.00124703	0.00326718	0.00391286	0	0.00547535	0.00487647	0.00514641
	No	2-butanone	6	4	0	0	0.000594352	0.00315702	0.00696948	0.0109746	0.0147906	0.00815085	0.0175032	0.0135909	0.0139226
	No	n-Butyl ethyl ether	5	6	0	0.00273054	0.00216371	0.00375947	0.00371868	0.00385747	0.00406479	0.00553698	0.00375614	0.00863043	0.00530131
	Yes	1-butanol	2	4	4.3913	4.21659	4.06984	4.09364	3.82747	3.75936	3.803	3.57157	3.50686	3.36191	3.21224
	Yes	2-pentanone	6	5	0	0.00159633	0.00317398	0.0050131	0.0144095	0.0262583	0.0303054	0.0288399	0.060965	0.0592214	0.08
	No	2-pentanol	2	5	0	0	0	0	0.00127786	0.00413012	0.00478008	0.004252	0.0119671	0.014	0.0188326
	No	octene	7	8	0	0	0	0	0	0	0	0	0.00114979	0	0.000354967
	No	2-octene	7	8	0	0	0	0	0	0	0.000618007	0	0	0	0.000215454
	No	2-methyl-1-butanol	2	5	0	0	0	0	0.00135052	0.00244408	0.00329772	0	0.00410172	0.00358804	0.0038583
	Yes	2-ethylbutanal	3	6	0	0.00365279	0.011039	0.0176418	0.031705	0.0274364	0.0277902	0.0401629	0.0319747	0.0318228	0.0338081
	No	3-methyl-2-pentanone	6	6	0	0	0	0	0	0.00145871	0.00198405	0	0.00236615	0	0.000530298
	Yes	ethyl butanoate	4	6	0	0.00277214	0.00870383	0.0137692	0.0404569	0.0653317	0.0757473	0.0709867	0.139854	0.143941	0.17289
	No	3-hexanone	6	6	0	0	0	0	0	0	0.000546236	0	0.00109177	0	0.000582175
	Yes	butyl acetate	4	6	0	0	0.00136804	0	0.0351872	0.0702469	0.0707353	0.0674667	0.150334	0.156915	0.182828
	Yes	hexanal	3	6	0	0.0103585	0.0299737	0.0492574	0.0732755	0.067196	0.0700109	0.0909881	0.0703701	0.0662749	0.0665753
	No	di-n-butyl ether	5	8	0	0	0	0	0	0	0	0	0	0	0.00021678
	Yes	2-ethylbutanol	2	6	0	0.0065527	0.0218251	0.0359766	0.087928	0.102276	0.101562	0.140068	0.141915	0.163574	0.175477
	No	3-hexen-1-ol	2	6	0	0	0.000712475	0.00187504	0.00141138	0	0.00440222	0	0.00286388	0	0.000337841
	No	1-butoxy-1-ethoxyethane	11	8	0	0.00267068	0.0036309	0.00436143	0.00343073	0.00331791	0.00562513	0.00326556	0.00231277	0	0.000851013
	Yes	1-hexanol	2	6	0	0.0469247	0.123526	0.186547	0.386478	0.40807	0.393906	0.537317	0.487877	0.523311	0.528674
	Yes	4-heptanone	6	7	0	0	0	0	0	0.0103598	0.0122876	0.00701638	0.0225234	0.0218061	0.0269141
	No	4-heptanol	2	7	0	0.00154056	0.00247712	0.0024222	0	0.00196652	0.0020486	0.00126671	0.00244238	0.00235881	0.00323932
	No	2-heptanol	2	7	0	0	0	0	0	0	0	0.000467474	0.00378462	0	0.00608384
	Yes	2-heptanone	6	7	0	0	0	0.00027235	0.00279609	0.00404954	0.00448777	0.00761179	0.0138692	0.00982764	0.0213961
	Yes	2-ethylhexanal	3	8	0	0.000930024	0.00325187	0.00566057	0.011893	0.00982072	0.00933865	0.0177286	0.0127854	0.0137734	0.0152904
	Yes	2-ethylbutyl acetate	4	8	0	0	0	0	0	0.00134769	0.0141761	0.00210847	0.00448111	0.00607577	0.00819286
	Yes	Butyl butanoate	4	8	0	0.000793301	0.0035822	0.00608698	0.023271	0.0423719	0.0393685	0.0532563	0.123007	0.137416	0.182416
	Yes	ethyl hexanoate	4	8	0	0	0.00106552	0.00230974	0.00810486	0.012302	0.0139928	0.0189225	0.0236755	0.0264236	0.0352731
	No	3-octanone	6	8	0	0	0	0.000269564	0.00200083	0.00134198	0.00168465	0.00141618	0.00190076	0	0.000804689
	Yes	hexyl acetate	4	8	0	0	0	0.000301088	0.00275118	0.00758753	0.00763581	0.00991161	0.0203089	0.0237546	0.029017
	Yes	octanal	3	8	0	0	0.00237327	0.00426135	0.010393	0.00891255	0.00894175	0.0159504	0.0119434	0.0122587	0.0135403
	Yes	2-ethylhexanol	2	8	0	0.0011147	0.00677618	0.00776081	0.0313265	0.0335117	0.0303379	0.0558668	0.0533811	0.0657674	0.0743833
	Yes	1-octanol	2	8	0	0.00303435	0.0118893	0.0189765	0.0449393	0.0432335	0.0391449	0.0766799	0.0601606	0.0701765	0.0768341
	Yes	4-nonanone	6	9	0	0	0	0.000452382	0.00375122	0.00470084	0.00500533	0.00805253	0.0109626	0.0129021	0.0180505
	No	2-nonanone	6	9	0	0	0	0	0	0.000831398	0.000876046	0.00174945	0.00250825	0.0030266	0.00456422
	Yes	butyl hexanoate	4	10	0	0	0.00107177	0.00210628	0.00948718	0.0157448	0.0189634	0.0277314	0.0508669	0.0613526	0.0883473
	No	octyl acetate	4	10	0	0	0	0	0.000468292	0.00101527	0.0011484	0.00183985	0.00281485	0.00400763	0.0052549
	Yes	2-butyl-1-octanol	2	12	0	0	0.000158103	0.000593461	0.00226361	0.00198555	0.00169351	0.00432193	0.00297241	0.00389148	0.00470208
	No	2-ethyl-1-octanol	2	10	0	0	0	0	0	0	0	0	0	0	0
	Yes	1-decanol	2	10	0	0.000577872	0.00141703	0.00243987	0.00670071	0.00564828	0.00490133	0.014523	0.00968935	0.0124879	0.0156874
	No	4-undecanone	6	11	0	0	0	0	0.000735063	0.00108072	0.00120281	0.00250281	0.00302135	0.00369173	0.00569344
	Yes	Butyl octanoate	4	12	0	0	0.000223669	0.000461276	0.00270269	0.0040102	0.00460831	0.00951108	0.0139962	0.0181482	0.0284019
	No	2-ethyl-1-decanol	2	12	0	0	0	0	0.000879728	0.000603304	0.000658535	0.00246792	0.00129751	0.00203244	0.00275116
	No	1-dodecanol	2	12	0	0	0	0.000138773	0.000995045	0.000520864	0.000400886	0.00298069	0.000730064	0.0020294	0.00282391

## Sheet: Raw data Control Experiments
	Feed			3´log10(τ)		-1.97758	-0.971843	0.00169032	1.00016	1.58767	1.99668	2.57602	2.98876	3.60633	4.0056
	Pure Ethanol			WHSV (galcohol h-1 gcat-1)→	∞	168.148	77.7045	36.8074	17.1045	10.8962	7.96048	5.10299	3.71745	2.31413	1.70333
				τ (h*kgcat/kmolgas) →	0	0.219184	0.474299	1.0013	2.15471	3.38238	4.62977	7.22228	9.91412	15.9262	21.6371
		Code		Carbon Balance	1	0.971544	1.01942	0.982652	0.987494	0.989151	0.962109	0.973252	0.945561	0.930095	0.922158
		2		Carbon in Alcohols	1	0.947082	0.961372	0.892519	0.874554	0.80153	0.797051	0.76411	0.688666	0.675384	0.656934
		3		Carbon in Aldehydes	0	0.0215867	0.0506146	0.0690001	0.093109	0.123747	0.115033	0.120998	0.0959227	0.0970136	0.0917083
		4		Carbon in Esters	0	0.000897476	0.00210732	0.0114447	0.0099445	0.046772	0.0368568	0.0672146	0.126023	0.124687	0.139266
		8		Carbon in Paraffins	0	0	0	0	0	0	0	0	0	0	0
		7		Carbon in Olefins	0	0	0	0.000320514	0.000500332	0.00118647	0.000951616	0.00172571	0.00185151	0.00196056	0.00223174
		6		Carbon in Ketones	0	0.00128255	0.0034065	0.00452511	0.00574345	0.0131201	0.00978063	0.0166693	0.0307913	0.0281991	0.0294208
		5		Carbon in Ethers	0	0.000694681	0.00185357	0.000973109	0.00223876	0.00137226	0.00120154	0.00184293	0.00140565	0.00168774	0.00215064
				Missing Carbon	0	0.0284564	-0.0193535	0.0212171	0.0139104	0.0122723	0.0391254	0.0274401	0.0553402	0.0710679	0.0782884
				Carbon Explained by modeled species = Normalizing values	1	0.970725	1	0.976624	0.981726	0.980192	0.95371	0.96145	0.929063	0.913494	0.904496
	Included in model?
		Compound	Code	CN	Concentration in the liquid mixture [M]
	No	methanol	2	1	0	0	0	0	0	0	0	0	0	0	0
	No	1-propene	7	4	0	0	0	0	0	0	0	0	0	0	0
	No	1-butene	7	4	0	0	0	0.00274926	0.00429167	0.00870067	0.00497725	0.01126	0.0124438	0.0125345	0.0115663
	Yes	acetaldehyde	3	2	0	0.296224	0.690986	0.842874	0.992948	1.2709	0.898605	0.907945	0.80461	0.66941	0.549894
	No	1-pentene	7	5	0	0	0	0	0	0	0	0	0	0	0
	No	diethyl ether	5	4	0	0.00595873	0.0158993	0.00834698	0.0192033	0.0117708	0.0103064	0.015808	0.0120572	0.0144768	0.0184474
	Yes	ethanol	2	2	17.1553	15.9849	15.9288	13.9679	12.7313	9.76364	8.79895	7.13261	6.59683	5.31799	4.71824
	No	2-propanol	2	3	0	0	0	0	0	0.00630547	0.0029978	0.0068814	0.023112	0.0160885	0.00967657
	Yes	acetone	6	3	0	0.0115407	0.0343979	0.0274075	0.0411103	0.0477936	0.037174	0.0453762	0.0945255	0.0757904	0.0607505
	No	1-hexene	7	6	0	0	0	0	0	0.00098432	0.00109649	0.00205796	0.00229185	0.00285503	0.00335749
	Yes	butyraldehyde	3	4	0	0.0332187	0.0784348	0.135454	0.230658	0.31291	0.364004	0.383568	0.298659	0.319166	0.318417
	Yes	ethyl acetate	4	4	0	0.0063851	0.0134195	0.0617685	0.0575598	0.198826	0.138595	0.204446	0.397733	0.292647	0.275514
	No	2-butanol	2	4	0	0	0	0	0	0.00385217	0.00202751	0.00372525	0.00793941	0.00512819	0.0049295
	No	2-butanone	6	4	0	0	0	0.00640561	0.00741425	0.0169757	0.0119086	0.0147553	0.0285222	0.0173688	0.0151156
	No	n-Butyl ethyl ether	5	6	0	0	0	0	0	0	0	0	0	0	0
	Yes	1-butanol	2	4	0	0.118215	0.252513	0.556567	0.91452	1.47169	1.7198	2.03491	1.81475	1.99788	2.01473
	Yes	2-pentanone	6	5	0	0.00187658	0.00273708	0.00752544	0.0072867	0.0234841	0.0178827	0.0315519	0.0640465	0.0560057	0.0628489
	No	2-pentanol	2	5	0	0	0	0	0	0.00323452	0.00126857	0.00367758	0.0120966	0.00948328	0.0116622
	No	octene	7	8	0	0	0	0	0	0	0.000770321	0.000227795	0	0	0.00127028
	No	2-octene	7	8	0	0	0	0	0	0	0	0	0	0	0
	No	2-methyl-1-butanol	2	5	0	0	0	0	0	0.00116274	0.000389314	0.00163238	0.00285245	0.00133955	0
	Yes	2-ethylbutanal	3	6	0	0.000948273	0.00200048	0.00653774	0.0126195	0.0181457	0.0286343	0.0314482	0.0206234	0.0291225	0.0316118
	No	3-methyl-2-pentanone	6	6	0	0	0	0	0	0	0	0	0	0	0
	Yes	ethyl butanoate	4	6	0	0.000875419	0.00310425	0.0152136	0.0146226	0.0602384	0.0510567	0.0825012	0.150679	0.142007	0.15823
	No	3-hexanone	6	6	0	0	0	0	0	0	0	0	0	0	0
	Yes	butyl acetate	4	6	0	0	0	0.00439093	0	0.0296195	0.0226522	0.0552107	0.112824	0.115432	0.123935
	Yes	hexanal	3	6	0	0.00160676	0.00481695	0.0128297	0.0280692	0.0416659	0.0614465	0.0695716	0.0407723	0.0575389	0.0608529
	No	di-n-butyl ether	5	8	0	0	0	0	0	0	0	0	0	0	0
	Yes	2-ethylbutanol	2	6	0	0.00112618	0.00239764	0.0142539	0.0176239	0.0548311	0.0684037	0.0989639	0.091713	0.133065	0.148737
	No	3-hexen-1-ol	2	6	0	0.000706947	0	0	0.000907135	0	0.00216773	0.00165894	0	0	0
	No	1-butoxy-1-ethoxyethane	11	8	0	0	0.000298488	0.0165935	0.00602358	0.00610521	0.0052943	0.00296935	0.00386623	0.00498814	0.00191474
	Yes	1-hexanol	2	6	0	0.0068882	0.0167266	0.0460444	0.102879	0.20981	0.289886	0.371329	0.291791	0.40181	0.432663
	Yes	4-heptanone	6	7	0	0	0	0.000883498	0	0.00646327	0.0014053	0.00989081	0.0156018	0.0172369	0.0177948
	No	4-heptanol	2	7	0	0	0	0.000580775	0.00245291	0.0011617	0.00204935	0.00229016	0	0.00199423	0.00221848
	No	2-heptanol	2	7	0	0	0	0	0	0	0	0	0.00160757	0	0
	Yes	2-heptanone	6	7	0	0	0	0	0	0.00417024	0.00314663	0.00715546	0.0134656	0.0145139	0.0171605
	Yes	2-ethylhexanal	3	8	0	0	0	0.00127564	0.00237603	0.00444228	0.00791977	0.00986734	0.00585285	0.0100746	0.0114258
	Yes	2-ethylbutyl acetate	4	8	0	0	0	0	0	0.000765242	0.000522989	0.00225366	0.00457043	0.00613345	0.00752536
	Yes	Butyl butanoate	4	8	0	0	0	0.00115793	0.000331082	0.00930226	0.00814063	0.0208703	0.0396022	0.0521852	0.0666181
	Yes	ethyl hexanoate	4	8	0	0	0	0.00233854	0.00212896	0.01231	0.0110698	0.0202976	0.0355455	0.0406125	0.048434
	No	3-octanone	6	8	0	0	0	0	0	0.000498356	0.0012326	0.00160557	0.001065	0.000498957	0.000487993
	Yes	hexyl acetate	4	8	0	0	0	0	0	0.00460513	0.00420896	0.0101923	0.0177185	0.0225241	0.0254994
	Yes	octanal	3	8	0	0	0	0.00168251	0.00286947	0.00724867	0.0112243	0.0145348	0.00901411	0.0140681	0.0158641
	Yes	2-ethylhexanol	2	8	0	0	0	0.00273755	0.0029079	0.0123975	0.0171546	0.0265342	0.0235838	0.0413497	0.0507282
	Yes	1-octanol	2	8	0	0	0.000348931	0.00739388	0.0112965	0.031771	0.0471801	0.0637519	0.0465734	0.0746099	0.0858157
	Yes	4-nonanone	6	9	0	0	0	0.000400282	0.00084889	0.00325548	0.00330934	0.00572161	0.00795562	0.0102659	0.01248
	No	2-nonanone	6	9	0	0	0	0	0	0.000683823	0.000710379	0.00184988	0.00311272	0.00382989	0.00478394
	Yes	butyl hexanoate	4	10	0	0	0	0	0.000189088	0.00359047	0.00382037	0.0147485	0.0233873	0.037156	0.0492598
	No	octyl acetate	4	10	0	0	0	0	0	0.00073239	0.00100021	0.00244451	0.00398441	0.00506573	0.00693348
	Yes	2-butyl-1-octanol	2	12	0	0	0	0	0.000268136	0.000490837	0.00118456	0.00150976	0.00106349	0.00227213	0.00283364
	No	2-ethyl-1-octanol	2	10	0	0	0	0	0	0	0	0	0	0	0
	Yes	1-decanol	2	10	0	0	0	0.0013981	0.00198797	0.00620176	0.0102582	0.0122968	0.00948533	0.0172744	0.0214597
	No	4-undecanone	6	11	0	0	0	0	0	0.000689093	0.000827978	0.00170108	0.00245109	0.00341319	0.00441078
	Yes	Butyl octanoate	4	12	0	0	0	0	0.000137941	0.00093612	0.00235014	0.00510636	0.00823024	0.0140838	0.0197266
	No	2-ethyl-1-decanol	2	12	0	0	0	0	0	0	0.000669753	0.000930991	0.000278756	0.0018946	0.002228
	No	1-dodecanol	2	12	0	0	0	0	0.00028777	0.00111324	0.00234681	0.00231839	0.00129307	0.0040655	0.00547686

## Sheet: Control Model
Mole concentrations (M)
	ethanol	1-butanol	1-hexanol	1-octanol	1-decanol	2-ethylbutanol	2-ethylhexanol	acetaldehyde	butyraldehyde	ethyl acetate	butyl acetate	ethyl butanoate	Butyl butanoate	hexanal	octanal	2-ethylbutanal	2-ethylhexanal	acetone	2-pentanone	butyl hexanoate	ethyl hexanoate	hexyl acetate	Butyl octanoate	2-ethylbutyl acetate	4-heptanone	4-nonanone	2-heptanone	2-butyl-1-octanol	2-butenal	2-hexenal	2-ethylbutenal	2-octenal	2-ethylhexenal	2-decenal	decanal	2-butyl-2-octenal	2-butyloctanal	water
τ (h*kgcat/kmolgas)	E	B	H	O	D	2EB	2EH	A	Bal	EA	BA	EB	BB	He	Oc	2EBa	2EHa	Ac	2Po	BH	EH	HA	BO	2EBAc	4Ho	4No	2Ho	2BO	Bal=	He=	2EBa=	Oc=	2EHe=	De=	De	2BHe=	2BHe	W
0	17.16	0	0	0	0	0	0	0	0	0	0	0	0	0	0	0	0	0	0	0	0	0	0	0	0	0	0	0	0	0	0	0	0	0	0	0	0	0
0.128251	16.6234	0.000812658	2.79831e-05	8.0763e-09	1.49726e-14	5.23021e-07	2.41486e-09	0.523504	0.00821856	0.00412874	1.29287e-07	3.76217e-05	1.29386e-09	2.27536e-05	1.98994e-07	8.96773e-06	4.54926e-08	0.000253774	4.98594e-06	1.41142e-11	1.41163e-07	5.7029e-09	2.27955e-13	9.19307e-11	2.60648e-08	5.63701e-11	4.81767e-09	8.92585e-18	0.00307164	2.97054e-05	5.49754e-06	1.62501e-07	3.82966e-08	4.78593e-11	4.32141e-11	6.81955e-14	5.83311e-14	0.0123382
0.149529	16.5355	0.00156436	6.94173e-05	3.10984e-08	1.00211e-13	1.46206e-06	9.49736e-09	0.598584	0.0130866	0.0055543	3.38188e-07	7.12542e-05	4.76653e-09	4.91222e-05	6.36136e-07	2.07656e-05	1.48681e-07	0.000394658	1.08938e-05	7.09156e-11	3.62911e-07	1.93875e-08	1.69401e-12	3.4837e-10	7.99289e-08	2.35211e-10	1.42986e-08	6.64843e-17	0.00409412	5.6844e-05	1.052e-05	4.29432e-07	1.03728e-07	2.28213e-10	2.45399e-10	3.5453e-13	3.65202e-13	0.0192488
0.174338	16.4338	0.00296474	0.00016587	1.14307e-07	6.23513e-13	3.96863e-06	3.55841e-08	0.680093	0.0204337	0.00744199	8.6561e-07	0.000132657	1.6819e-08	0.000102636	1.93679e-06	4.65272e-05	4.62041e-07	0.000608518	2.32545e-05	3.33122e-10	9.04145e-07	6.30284e-08	1.13719e-11	1.2699e-09	2.35076e-07	9.22045e-10	4.08065e-08	4.4633e-16	0.00534967	0.000104875	1.94091e-05	1.07767e-06	2.6625e-07	1.01718e-09	1.30135e-09	1.67287e-12	2.07345e-12	0.0298056
0.203263	16.3166	0.00552362	0.000382067	4.10911e-07	4.03246e-12	1.05226e-05	1.30219e-07	0.766432	0.0311769	0.00991674	2.17634e-06	0.000242407	5.78397e-08	0.000207325	5.66394e-06	0.000100724	1.37585e-06	0.000927918	4.84394e-05	1.52812e-09	2.19207e-06	1.98528e-07	7.64273e-11	4.55521e-09	6.67229e-07	3.47836e-09	1.1278e-07	3.04965e-15	0.00683098	0.000185685	3.43644e-05	2.56746e-06	6.46434e-07	4.39796e-09	6.90913e-09	7.39478e-12	1.14549e-11	0.0457048
0.236988	16.1821	0.0100716	0.000841917	1.41144e-06	2.50081e-11	2.69498e-05	4.53782e-07	0.854981	0.0462922	0.0131202	5.32988e-06	0.000432946	1.90693e-07	0.000403081	1.56852e-05	0.00020909	3.8657e-06	0.00139506	9.78641e-05	6.64143e-09	5.13351e-06	5.96449e-07	4.7861e-10	1.57393e-08	1.80709e-06	1.23721e-08	2.98721e-07	1.93851e-14	0.00849942	0.000314139	5.81373e-05	5.7713e-06	1.47567e-06	1.78319e-08	3.47684e-08	2.99731e-11	5.83471e-11	0.0692083
0.276308	16.0286	0.0178807	0.0017625	4.53152e-06	1.38663e-10	6.58859e-05	1.47147e-06	0.942052	0.0666057	0.0172022	1.25805e-05	0.000752377	5.9089e-07	0.000750851	4.06263e-05	0.000413163	1.01115e-05	0.0020608	0.000190459	2.6503e-08	1.15245e-05	1.68226e-06	2.63599e-09	5.11621e-08	4.60944e-06	4.06318e-08	7.49897e-07	1.07894e-13	0.0102697	0.000504927	9.3446e-05	1.21554e-05	3.13701e-06	6.57831e-08	1.582e-07	1.08799e-10	2.64022e-10	0.103149
0.322151	15.8546	0.0307627	0.00349175	1.36926e-05	7.27875e-10	0.000153362	4.46708e-06	1.0232	0.0923934	0.022301	2.85391e-05	0.0012669	1.72725e-06	0.00133506	9.82915e-05	0.000772562	2.45538e-05	0.00297963	0.00035523	9.91088e-08	2.47638e-05	4.4607e-06	1.34886e-08	1.57433e-07	1.104e-05	1.24084e-07	1.78265e-06	5.59162e-13	0.0120107	0.000766137	0.000141788	2.389e-05	6.16574e-06	2.23658e-07	6.71514e-07	3.57914e-10	1.09676e-09	0.150744
0.3756	15.6588	0.0510078	0.00651043	3.85767e-05	3.5409e-09	0.000337187	1.25563e-05	1.09389	0.123024	0.0285232	6.17753e-05	0.00205758	4.71322e-06	0.00225663	0.000220394	0.00135758	5.48224e-05	0.00420164	0.000631194	3.42886e-07	5.06917e-05	1.10332e-05	6.25787e-08	4.53779e-07	2.46135e-05	3.48902e-07	3.98785e-06	2.64523e-12	0.0135734	0.00109275	0.000202234	4.3643e-05	1.11385e-05	6.92708e-07	2.61794e-06	1.05701e-09	4.12253e-09	0.215219
0.437918	15.4405	0.0811341	0.0113803	0.000100103	1.53996e-08	0.000694609	3.22523e-05	1.15037	0.156821	0.0359263	0.000126616	0.00321154	1.18532e-05	0.00361721	0.000454798	0.00223097	0.000111681	0.00576339	0.00106364	1.0773e-06	9.83952e-05	2.52461e-05	2.54821e-07	1.20831e-06	5.06854e-05	8.93163e-07	8.34414e-06	1.10661e-11	0.0148206	0.00146238	0.00027064	7.39896e-05	1.8433e-05	1.9291e-06	9.16071e-06	2.7799e-09	1.37613e-08	0.299307
0.510575	15.1993	0.123452	0.0186382	0.000237967	5.8945e-08	0.0013352	7.53289e-05	1.19048	0.19125	0.0445058	0.00024471	0.00480781	2.73641e-05	0.00549702	0.000861817	0.00342278	0.0002073	0.00768024	0.00169689	3.06508e-06	0.000180688	5.33132e-05	9.08695e-07	2.95363e-06	9.6227e-05	2.07854e-06	1.63001e-05	4.05731e-11	0.0156628	0.00183783	0.000340124	0.000116604	2.79831e-05	4.81719e-06	2.85394e-05	6.56553e-09	4.0809e-08	0.404744
0.595286	14.9353	0.179392	0.0286233	0.000519548	2.04241e-07	0.00239219	0.000160361	1.21452	0.223534	0.0541905	0.000445519	0.00689796	5.80069e-05	0.00792979	0.00149891	0.00490222	0.000350729	0.00994054	0.0025628	7.93915e-06	0.000314011	0.000104118	2.874e-06	6.64686e-06	0.000168483	4.40908e-06	2.97668e-05	1.34036e-10	0.0160908	0.00217781	0.000403044	0.000171394	3.90671e-05	1.08351e-05	8.02511e-05	1.38527e-08	1.08765e-07	0.531777
0.694053	14.6489	0.2493	0.0414158	0.00104224	6.31858e-07	0.00400201	0.00031182	1.2243	0.251484	0.0648706	0.000765059	0.00950281	0.000113038	0.0109007	0.00240083	0.00658447	0.000544268	0.0125161	0.00367717	1.86431e-05	0.000517609	0.000188782	7.96164e-06	1.37764e-05	0.000273472	8.55621e-06	5.10045e-05	3.94677e-10	0.0161508	0.00245213	0.000453812	0.000236826	5.07157e-05	2.20552e-05	0.000203063	2.63379e-08	2.60039e-07	0.679591
0.809206	14.3407	0.332207	0.0567959	0.00192903	1.77602e-06	0.00627415	0.00055721	1.22292	0.274085	0.0764155	0.00124321	0.0126065	0.000203799	0.0143448	0.00355558	0.00834924	0.000781642	0.0153678	0.00503638	4.00555e-05	0.000811732	0.000319759	1.95929e-05	2.64457e-05	0.000414551	1.53158e-05	8.24205e-05	1.05247e-09	0.0159298	0.00264867	0.000490185	0.00031003	6.19943e-05	4.09332e-05	0.000467234	4.57432e-08	5.64425e-07	0.846505
0.943465	14.0114	0.426388	0.0743826	0.00331273	4.53602e-06	0.00927747	0.000923327	1.21336	0.291374	0.0886977	0.00192161	0.0161747	0.000342899	0.0181738	0.00490111	0.0100831	0.00105172	0.0184576	0.00662668	7.93297e-05	0.00121659	0.000509984	4.31441e-05	4.7322e-05	0.000592811	2.55454e-05	0.000126446	2.55183e-09	0.0155124	0.00277056	0.000512743	0.000387762	7.23077e-05	6.98607e-05	0.000983168	7.35561e-08	1.12317e-06	1.03074
1.1	13.662	0.529684	0.093718	0.00531565	1.06174e-05	0.0130333	0.00143344	1.19817	0.304141	0.101599	0.00284183	0.0201635	0.000543585	0.0222928	0.00632964	0.0117035	0.00134231	0.0217518	0.00842952	0.000146196	0.00175137	0.000772259	8.59808e-05	7.95741e-05	0.000807705	4.01196e-05	0.000185441	5.68622e-09	0.0149692	0.00283076	0.000523884	0.000466945	8.14111e-05	0.000110675	0.0019095	1.10611e-07	2.07257e-06	1.23066
1.28251	13.2932	0.639914	0.114362	0.00802337	2.30102e-05	0.0175196	0.00210558	1.17923	0.313544	0.115019	0.00404358	0.0245301	0.00081932	0.0266125	0.00770601	0.0131723	0.00164391	0.0252233	0.0104271	0.000253122	0.00243306	0.00111866	0.000156897	0.000126727	0.00105809	5.99046e-05	0.000261595	1.17798e-08	0.0143509	0.00284569	0.000526647	0.000544944	8.93509e-05	0.000164086	0.00345403	1.57167e-07	3.58507e-06	1.44501
1.49529	12.9059	0.755167	0.135952	0.0114647	4.6584e-05	0.0226887	0.0029533	1.15771	0.320685	0.128871	0.00556442	0.0292397	0.00118389	0.0310566	0.00889683	0.0144912	0.00195156	0.0288517	0.0126063	0.000415286	0.00327633	0.00156052	0.000264869	0.000192541	0.00134325	8.57703e-05	0.000356938	2.29165e-08	0.0136885	0.00282961	0.000523672	0.000619605	9.62867e-05	0.000229321	0.00586612	2.13113e-07	5.86786e-06	1.67297
1.74338	12.5008	0.873855	0.158203	0.0156035	8.87756e-05	0.0284842	0.00398768	1.13425	0.326403	0.143075	0.00744024	0.0342663	0.00165182	0.0355639	0.00979577	0.0156858	0.00226416	0.0326197	0.0149587	0.000650591	0.00429378	0.00210862	0.00041764	0.00028095	0.00166334	0.000118623	0.000473374	4.22248e-08	0.0129998	0.00279285	0.000516867	0.00068925	0.000102366	0.000304127	0.00942324	2.7787e-07	9.1625e-06	1.91398
2.03263	12.079	0.994674	0.180896	0.0203389	0.000160373	0.0348517	0.00521879	1.10922	0.331258	0.157552	0.00970486	0.0395898	0.00223865	0.040085	0.0103419	0.0167917	0.00258299	0.0365117	0.0174799	0.000979681	0.00549561	0.00277311	0.000620454	0.000396006	0.00201936	0.000159422	0.00061267	7.42453e-08	0.0122952	0.00274196	0.000507451	0.000752609	0.000107686	0.000385002	0.0144113	3.50511e-07	1.37445e-05	2.16765
2.36988	11.6414	1.11653	0.203853	0.0255171	0.000276392	0.0417448	0.00665671	1.08278	0.335569	0.172223	0.0123899	0.0451941	0.00296111	0.0445797	0.0105286	0.0178433	0.00291032	0.0405127	0.0201675	0.00142594	0.00688966	0.00356359	0.000875273	0.000541859	0.00241303	0.000209192	0.000776443	1.25408e-07	0.0115808	0.00268074	0.00049612	0.000808792	0.000112296	0.000467737	0.0211031	4.29792e-07	1.99227e-05	2.43362
2.76308	11.189	1.23854	0.226941	0.0309553	0.000456924	0.0491299	0.00831202	1.05504	0.339489	0.187017	0.0155242	0.0510658	0.00383705	0.0490136	0.0104027	0.018869	0.00324845	0.0446094	0.0230212	0.00201531	0.00848105	0.0044888	0.0011807	0.000722684	0.00284668	0.000269012	0.000966132	2.04615e-07	0.0108625	0.00261115	0.000483241	0.000856938	0.000116189	0.000547672	0.0297316	5.14612e-07	2.80354e-05	2.71162
3.22151	10.7229	1.35983	0.250032	0.0364723	0.000727895	0.0569833	0.0101962	1.02607	0.343069	0.201852	0.0191342	0.0571899	0.00488574	0.0533569	0.0100435	0.0198866	0.0035989	0.0487867	0.0260407	0.00277657	0.0102725	0.00555694	0.00153319	0.000942767	0.00332297	0.000340042	0.00118304	3.23926e-07	0.0101446	0.00253424	0.000469008	0.000896627	0.000119354	0.000620971	0.0404809	6.03415e-07	3.8455e-05	3.00124
3.756	10.2444	1.47961	0.273013	0.0419112	0.00112203	0.0652887	0.0123208	0.995945	0.346312	0.216652	0.0232433	0.0635507	0.00612767	0.0575828	0.00954581	0.0209071	0.00396278	0.0530304	0.0292255	0.00374094	0.0122639	0.00677537	0.00192821	0.00120645	0.00384485	0.0004235	0.00142829	4.9951e-07	0.00943171	0.0024507	0.000453546	0.000927533	0.00012177	0.000684621	0.0534742	6.94716e-07	5.1582e-05	3.30203
4.37918	9.7547	1.59711	0.295777	0.0471567	0.00167979	0.0740337	0.0146975	0.964714	0.349196	0.231337	0.0278714	0.0701296	0.00758449	0.0616674	0.00899687	0.0219356	0.0043408	0.0573254	0.0325749	0.00494214	0.0144524	0.00815051	0.0023618	0.00151812	0.00441546	0.000520668	0.00170283	7.52764e-07	0.00872781	0.00236103	0.000436953	0.000949554	0.000123425	0.000736858	0.0687775	7.86939e-07	6.78457e-05	3.61344
5.10575	9.25535	1.71155	0.318217	0.0521398	0.00245039	0.0832075	0.0173374	0.932411	0.351686	0.245827	0.0330342	0.0769057	0.00927902	0.0655887	0.00846192	0.0229736	0.00473343	0.0616564	0.0360871	0.00641605	0.016832	0.00968773	0.00283164	0.00188222	0.00503811	0.000632889	0.0020074	1.11173e-06	0.00803685	0.00226576	0.000419321	0.000962693	0.000124311	0.000776974	0.0864058	8.78566e-07	8.77017e-05	3.93483
5.95286	8.74794	1.82214	0.340228	0.0568309	0.00349316	0.0927973	0.020251	0.89906	0.353745	0.260039	0.0387429	0.0838544	0.0112351	0.0693269	0.00797821	0.0240208	0.00514106	0.0660071	0.0397594	0.00820057	0.0193939	0.011391	0.00333743	0.0023031	0.00571623	0.000761567	0.00234254	1.61286e-06	0.00736224	0.00216539	0.000400745	0.000967113	0.000124431	0.00080514	0.106333	9.68103e-07	0.000111631	4.26545
6.94053	8.23431	1.92807	0.3617	0.061226	0.00487902	0.102787	0.0234475	0.864672	0.355331	0.273889	0.0450026	0.0909477	0.0134774	0.0728638	0.00755832	0.0250755	0.00556403	0.0703602	0.0435873	0.0103352	0.0221257	0.0132628	0.00388057	0.002785	0.0064533	0.000908161	0.00270853	2.30318e-06	0.00670714	0.00206046	0.000381326	0.000963074	0.000123797	0.000822005	0.128498	1.05415e-06	0.000140136	4.60442
8.09206	7.71653	2.02851	0.38252	0.0653312	0.0066924	0.113156	0.0269347	0.829264	0.356399	0.28729	0.051811	0.0981526	0.0160313	0.0761826	0.00719857	0.0261354	0.00600264	0.0746963	0.0475643	0.0128604	0.0250115	0.0153034	0.00446346	0.00333187	0.00725283	0.00107418	0.00310533	3.24309e-06	0.00607411	0.00195156	0.000361171	0.000950994	0.000122433	0.000828483	0.152809	1.13537e-06	0.00017374	4.95068
9.43465	7.19673	2.12265	0.402574	0.0691553	0.00903298	0.123879	0.0307191	0.792852	0.356906	0.300156	0.0591585	0.105434	0.0189224	0.079271	0.00688757	0.0271983	0.00645735	0.0789963	0.0516826	0.0158172	0.0280324	0.0175109	0.00508891	0.0039472	0.0081184	0.00126118	0.00353265	4.50962e-06	0.00546423	0.00183921	0.000340379	0.000931498	0.000120376	0.000825659	0.17914	1.2106e-06	0.000212981	5.30312
11	6.67698	2.20977	0.421768	0.072704	0.0120173	0.13493	0.0348061	0.755438	0.356817	0.312415	0.0670275	0.112758	0.0221767	0.082117	0.00661412	0.0282624	0.00692862	0.0832425	0.055934	0.0192458	0.031167	0.0198811	0.00575978	0.00463388	0.00905381	0.00147079	0.00398991	6.20022e-06	0.004881	0.00172415	0.000319086	0.000904992	0.000117657	0.000814186	0.207333	1.27902e-06	0.000258405	5.66064
12.8251	6.15984	2.28905	0.439984	0.075972	0.0157826	0.146271	0.0391984	0.717065	0.356096	0.32398	0.0753888	0.120082	0.0258199	0.0847084	0.0063704	0.0293249	0.00741679	0.0874127	0.0603057	0.0231858	0.0343896	0.0224062	0.00647841	0.0053939	0.0100626	0.00170465	0.00447608	8.43846e-06	0.00432686	0.00160717	0.000297436	0.000872099	0.00011432	0.000794832	0.237182	1.33977e-06	0.000310574	6.02179
14.9529	5.64814	2.35966	0.457101	0.07895	0.0204885	0.157857	0.0438963	0.6778	0.354713	0.334768	0.0842012	0.127359	0.0298771	0.0870345	0.00615169	0.030383	0.00792213	0.0914833	0.0647821	0.0276744	0.037671	0.0250745	0.00724692	0.00622812	0.0111482	0.00196446	0.0049897	1.13802e-05	0.0038041	0.00148911	0.000275587	0.000833518	0.00011042	0.000768371	0.268423	1.39222e-06	0.000370049	6.38491
17.4338	5.14487	2.42084	0.473	0.0816279	0.0263198	0.169636	0.0488971	0.63773	0.352643	0.344697	0.09341	0.13454	0.0343721	0.0890867	0.00595525	0.0314341	0.00844494	0.0954302	0.0693447	0.0327449	0.0409788	0.0278701	0.00806726	0.00713584	0.0123139	0.00225194	0.0055288	1.52214e-05	0.00331482	0.00137088	0.000253707	0.000790014	0.000106018	0.00073562	0.300732	1.43588e-06	0.000437389	6.7482
20.3263	4.65316	2.47186	0.487562	0.0839972	0.0334885	0.181548	0.0541952	0.596981	0.349865	0.353689	0.102946	0.141574	0.039327	0.0908602	0.00577897	0.0324755	0.00898557	0.0992286	0.073972	0.038425	0.0442773	0.0307721	0.00894131	0.00811452	0.013563	0.00256884	0.00609093	2.02081e-05	0.00285863	0.00125319	0.000231925	0.000742502	0.000101185	0.000697591	0.333714	1.47052e-06	0.000513139	7.10966
23.6988	4.17558	2.51226	0.500716	0.0860571	0.0422332	0.193539	0.0597858	0.555602	0.346389	0.361696	0.112733	0.148419	0.0447638	0.0923544	0.00562171	0.0335053	0.00954441	0.10286	0.078644	0.044737	0.047532	0.0337564	0.0098714	0.00915948	0.0148991	0.00291706	0.00667347	2.66451e-05	0.0024394	0.00113721	0.000210462	0.000691653	9.59923e-05	0.000654962	0.366929	1.49623e-06	0.000597843	7.46762

## Sheet: Cofeed Model
Mole concentrations (M)
	ethanol	1-butanol	1-hexanol	1-octanol	1-decanol	2-ethylbutanol	2-ethylhexanol	acetaldehyde	butyraldehyde	ethyl acetate	butyl acetate	ethyl butanoate	Butyl butanoate	hexanal	octanal	2-ethylbutanal	2-ethylhexanal	acetone	2-pentanone	butyl hexanoate	ethyl hexanoate	hexyl acetate	Butyl octanoate	2-ethylbutyl acetate	4-heptanone	4-nonanone	2-heptanone	2-butyl-1-octanol	2-butenal	2-hexenal	2-ethylbutenal	2-octenal	2-ethylhexenal	2-decenal	decanal	2-butyl-2-octenal	2-butyloctanal	water
τ (h*kgcat/kmolgas)	E	B	H	O	D	2EB	2EH	A	Bal	EA	BA	EB	BB	He	Oc	2EBa	2EHa	Ac	2Po	BH	EH	HA	BO	2EBAc	4Ho	4No	2Ho	2BO	Bal=	He=	2EBa=	Oc=	2EHe=	De=	De	2BHe=	2BHe	W
0	10.2466	4.39139	0	0	0	0	0	0	0	0	0	0	0	0	0	0	0	0	0	0	0	0	0	0	0	0	0	0	0	0	0	0	0	0	0	0	0	0
0.128251	9.92331	4.11482	0.00170701	6.01493e-07	1.43584e-12	4.30989e-05	1.78019e-05	0.314797	0.275325	0.00174676	0.00151642	0.00200383	0.0012256	0.00095364	1.03378e-05	0.000455946	0.000155621	0.000108124	0.000217703	1.04107e-05	6.88218e-06	3.58563e-07	1.59102e-07	7.38102e-09	9.53447e-05	1.95534e-07	2.18236e-07	6.79272e-14	0.00126856	0.000839643	0.000155391	5.64092e-06	5.24342e-05	2.81395e-09	3.29821e-09	1.93069e-10	2.82141e-10	0.00964903
0.149529	9.86989	4.08012	0.00284058	1.56223e-06	6.60919e-12	8.21764e-05	3.34273e-05	0.36002	0.308928	0.00234954	0.00203407	0.00265689	0.00162064	0.00141026	2.20748e-05	0.000717137	0.000240366	0.000168137	0.000333203	1.82503e-05	1.21022e-05	8.21884e-07	4.02665e-07	1.91584e-08	0.000143658	3.90183e-07	4.43021e-07	2.36497e-13	0.00168511	0.00109322	0.00020232	9.93191e-06	6.70978e-05	8.95735e-09	1.26984e-08	4.49754e-10	8.08618e-10	0.0148996
0.174338	9.80815	4.04346	0.00462195	3.95033e-06	2.95897e-11	0.000154129	6.16555e-05	0.409103	0.344206	0.0031456	0.0027157	0.0035029	0.00213089	0.00205524	4.56733e-05	0.00110527	0.000363307	0.000259051	0.000504804	3.15234e-05	2.09673e-05	1.8339e-06	9.90499e-07	4.87322e-08	0.000214057	7.6241e-07	8.814e-07	7.9449e-13	0.00219465	0.00139438	0.000258056	1.69418e-05	8.41178e-05	2.72846e-08	4.71466e-08	1.00331e-09	2.22615e-09	0.0227903
0.203263	9.73712	4.00563	0.00734277	9.67036e-06	1.26033e-10	0.000283398	0.000111361	0.461127	0.380427	0.00418567	0.00360405	0.00458682	0.002783	0.00294916	9.12616e-05	0.00166501	0.000536248	0.00039437	0.000755255	5.35887e-05	3.57437e-05	3.96588e-06	2.35689e-06	1.2057e-07	0.000314807	1.45526e-06	1.71353e-06	2.55338e-12	0.00279539	0.00173919	0.000321868	2.79458e-05	0.000103224	7.86909e-08	1.66266e-07	2.13656e-09	5.86061e-09	0.0344447
0.236988	9.65587	3.96767	0.0113704	2.28818e-05	5.152e-10	0.000509262	0.000196421	0.514616	0.416642	0.0055257	0.00474667	0.00595691	0.0036059	0.00416114	0.000175666	0.00244437	0.000771143	0.000591404	0.00111299	8.95533e-05	5.98729e-05	8.29545e-06	5.41734e-06	2.895e-07	0.000455976	2.70905e-06	3.24846e-06	7.88141e-12	0.00347295	0.00211748	0.000391878	4.45162e-05	0.000123906	2.15189e-07	5.58846e-07	4.3507e-09	1.4776e-08	0.0512946
0.276308	9.56359	3.93083	0.0171288	5.21942e-05	2.03384e-09	0.000891087	0.000337249	0.567562	0.451748	0.00722226	0.0061926	0.00766106	0.00462896	0.00576257	0.000324674	0.00348597	0.00107783	0.000870637	0.00161097	0.000146862	9.83489e-05	1.67423e-05	1.19972e-05	6.72692e-07	0.000648998	4.90839e-06	5.98995e-06	2.34304e-11	0.00419831	0.00251284	0.000465048	6.83936e-05	0.000145454	5.57438e-07	1.79326e-06	8.48945e-09	3.57242e-08	0.0750312
0.322151	9.45965	3.89655	0.0250591	0.000113827	7.47623e-09	0.00151161	0.00056166	0.617573	0.48454	0.00932763	0.00798903	0.00974343	0.00588053	0.00782017	0.000573665	0.00481641	0.00146168	0.00125413	0.00228425	0.000235841	0.000158033	3.24312e-05	2.54205e-05	1.49796e-06	0.000905917	8.62596e-06	1.06972e-05	6.60789e-11	0.00492715	0.0029029	0.000537235	0.000101152	0.000166967	1.35222e-06	5.37934e-06	1.58286e-08	8.22749e-08	0.107486
0.3756	9.34366	3.86619	0.0355501	0.000236286	2.5391e-08	0.00247734	0.000904803	0.662198	0.513865	0.0118818	0.0101755	0.0122385	0.00738503	0.0103866	0.000965504	0.00643204	0.00192065	0.00176251	0.0031656	0.000370246	0.000247925	6.00826e-05	5.13662e-05	3.17773e-06	0.00123801	1.46645e-05	1.844e-05	1.76036e-10	0.00560439	0.0032618	0.000603655	0.000143684	0.000187435	3.05259e-06	1.49904e-05	2.80427e-08	1.79891e-07	0.150404
0.437918	9.21549	3.84076	0.0488461	0.000465922	8.09763e-08	0.00391007	0.00140644	0.699484	0.538857	0.014903	0.0127768	0.0151641	0.00915945	0.0134811	0.00154253	0.0082872	0.0024432	0.00241069	0.00427922	0.000567287	0.000378989	0.000106268	9.88214e-05	6.4107e-06	0.00165386	2.40716e-05	3.06115e-05	4.45552e-10	0.00618037	0.0035674	0.000660213	0.00019603	0.000206	6.42191e-06	3.90262e-05	4.73174e-08	3.73673e-07	0.205112
0.510575	9.07522	3.82093	0.0650229	0.000869387	2.37774e-07	0.00593393	0.0021074	0.728135	0.558905	0.0183896	0.0158046	0.0185236	0.0112145	0.0170937	0.00233623	0.0103023	0.00301086	0.00320653	0.00563924	0.000847497	0.00056386	0.000179239	0.000180472	1.22491e-05	0.00215901	3.81111e-05	4.88737e-05	1.06223e-09	0.00661717	0.00380293	0.000703802	0.000257175	0.000221938	1.2554e-05	9.40472e-05	7.60713e-08	7.35404e-07	0.272429
0.595286	8.92315	3.80681	0.0839467	0.00153422	6.42065e-07	0.00865713	0.00304446	0.747804	0.573811	0.022318	0.0192558	0.022303	0.0135535	0.0211831	0.0033544	0.0123724	0.00360023	0.004149	0.00724672	0.00123423	0.000816218	0.00028856	0.000312784	2.21615e-05	0.00275492	5.82079e-05	7.50649e-05	2.38423e-09	0.00689679	0.00396035	0.000732935	0.000325006	0.000234779	2.28305e-05	0.000209891	1.16516e-07	1.37235e-06	0.352512
0.694053	8.75963	3.79785	0.105296	0.00256208	1.6098e-06	0.0121492	0.0042441	0.759185	0.583886	0.0266475	0.023115	0.0264749	0.016173	0.0256746	0.00456918	0.0143903	0.00418815	0.00522854	0.00908998	0.00175233	0.0011496	0.000444251	0.000514775	3.80236e-05	0.00343897	8.58319e-05	0.000111027	5.06127e-09	0.00702598	0.00404259	0.000748156	0.000396904	0.000244454	3.8749e-05	0.000435838	1.70532e-07	2.4337e-06	0.44487
0.809206	8.58509	3.79325	0.12866	0.00405815	3.74492e-06	0.0164398	0.00572281	0.763389	0.589655	0.0313303	0.0273619	0.031005	0.019067	0.0304806	0.00592105	0.0162686	0.004756	0.00643161	0.011151	0.0024281	0.00157725	0.000656336	0.000806251	6.20525e-05	0.00420641	0.000122458	0.000158548	1.01716e-08	0.00702383	0.00405811	0.000751028	0.000470114	0.000251102	6.16724e-05	0.000844492	2.39339e-07	4.11223e-06	0.548714
0.943465	8.39999	3.792	0.153578	0.00611739	8.12291e-06	0.0215154	0.007486	0.761788	0.591838	0.0363157	0.0319744	0.0358556	0.0222282	0.0355081	0.00732409	0.0179509	0.00529206	0.00774253	0.0134082	0.00328837	0.00211129	0.000934302	0.00120543	9.67221e-05	0.00505112	0.000169497	0.000219271	1.94218e-08	0.00691687	0.00401921	0.000743829	0.000542065	0.000255063	9.25603e-05	0.00153514	3.23243e-07	6.64535e-06	0.663091
1.1	8.20477	3.79304	0.179608	0.00881004	1.65343e-05	0.0273264	0.0095301	0.755737	0.591214	0.0415554	0.0369318	0.04099	0.0256498	0.0406671	0.00867951	0.0194165	0.00579229	0.00914585	0.0158398	0.00435997	0.00276237	0.00128681	0.00172644	0.000144658	0.00596688	0.000228263	0.000294652	3.53926e-08	0.00673245	0.00393907	0.000728998	0.000610626	0.000256776	0.000131746	0.00263394	4.21619e-07	1.03124e-05	0.787073
1.28251	7.99982	3.79537	0.206354	0.0121705	3.17885e-05	0.0338005	0.011846	0.746387	0.5885	0.0470055	0.0422164	0.0463749	0.0293273	0.0458768	0.00989185	0.0206748	0.00625903	0.0106278	0.0184266	0.00566949	0.00353948	0.00172166	0.00237741	0.000208552	0.00694822	0.000299975	0.000385967	6.18378e-08	0.00649411	0.0038295	0.00070872	0.000674187	0.00025668	0.00017883	0.0042909	5.32996e-07	1.54305e-05	0.919868
1.49529	7.78553	3.79821	0.233487	0.016191	5.8076e-05	0.0408563	0.0144227	0.734622	0.584285	0.0526279	0.0478145	0.0519817	0.0332589	0.0510678	0.0108833	0.0217557	0.00669877	0.0121769	0.0211527	0.00724321	0.00444989	0.00224588	0.00315933	0.000291099	0.00799096	0.000385775	0.000494325	1.04045e-07	0.00621997	0.00369989	0.000684732	0.000731581	0.000255151	0.000232674	0.00667388	6.55374e-07	2.23494e-05	1.06087
1.74338	7.56222	3.80089	0.260739	0.0208219	0.00010138	0.0484145	0.0172498	0.721068	0.57901	0.0583893	0.0537161	0.0577862	0.0374457	0.0561817	0.011603	0.0226976	0.00711969	0.0137838	0.0240061	0.00910709	0.00549923	0.00286582	0.00406616	0.000394961	0.00909222	0.000486749	0.000620695	1.6927e-07	0.00592313	0.00355713	0.000658313	0.00078196	0.000252475	0.000291477	0.0099604	7.86469e-07	3.14471e-05	1.20965
2.03263	7.33029	3.80294	0.287881	0.0259772	0.000169938	0.0564033	0.0203194	0.706147	0.572975	0.0642579	0.0599123	0.0637656	0.0418904	0.0611695	0.0120292	0.0235386	0.00752945	0.0154402	0.0269765	0.0112871	0.00669158	0.00358735	0.00508595	0.000522796	0.01025	0.00060396	0.000765936	2.67269e-07	0.00561261	0.003406	0.000630343	0.000824776	0.000248851	0.000353032	0.0143305	9.23547e-07	4.31286e-05	1.36587
2.36988	7.09008	3.80398	0.31473	0.0315404	0.000274833	0.0647623	0.0236259	0.690145	0.566378	0.0702054	0.0663967	0.0699005	0.0465986	0.065993	0.0121709	0.0243128	0.00793489	0.0171395	0.0300565	0.0138089	0.00802933	0.0044157	0.00620179	0.000677214	0.0114634	0.000738434	0.000930777	4.11014e-07	0.0052944	0.00324963	0.000601404	0.000859822	0.000244421	0.000414979	0.0199563	1.06371e-06	5.78171e-05	1.52929
2.76308	6.84199	3.80372	0.341129	0.0373794	0.000430465	0.0734437	0.0271668	0.673244	0.559339	0.0762042	0.0731635	0.0761725	0.0515771	0.070617	0.01206	0.0250459	0.0083408	0.0188753	0.0332395	0.016698	0.00951328	0.00535565	0.00739452	0.000860797	0.0127321	0.000891184	0.00111584	6.17384e-07	0.00497326	0.00309035	0.000571926	0.000886803	0.000239273	0.000474742	0.0269932	1.20443e-06	7.59559e-05	1.69971
3.22151	6.58642	3.80191	0.366942	0.0433559	0.000655272	0.0824096	0.0309417	0.655567	0.551926	0.0822277	0.0802072	0.0825634	0.056834	0.0750145	0.0117447	0.0257564	0.0087505	0.0206421	0.0365201	0.0199798	0.0111425	0.00641136	0.00864434	0.00107611	0.0140561	0.00106321	0.00132163	9.08231e-07	0.00465227	0.00292964	0.000542183	0.000905786	0.000233474	0.000530142	0.0355734	1.34297e-06	9.80019e-05	1.87694
3.756	6.32381	3.79834	0.392051	0.0493376	0.000972385	0.0916308	0.0349516	0.637195	0.54418	0.0882494	0.0875223	0.0890554	0.0623789	0.0791623	0.0112816	0.0264559	0.00916609	0.0224345	0.0398934	0.0236794	0.0129145	0.00758638	0.00993288	0.00132569	0.015436	0.0012555	0.00154854	1.31152e-06	0.00433414	0.00276872	0.000512403	0.000916841	0.000227079	0.000579223	0.0458001	1.4769e-06	0.000124423	2.06078
4.37918	6.05459	3.7928	0.416359	0.0552081	0.00141034	0.101086	0.0391991	0.618182	0.536123	0.0942441	0.0951038	0.0956317	0.068223	0.0830428	0.0107266	0.0271512	0.00958886	0.0242478	0.0433553	0.0278216	0.0148251	0.00888364	0.0112449	0.00161203	0.0168729	0.00146904	0.00179686	1.86273e-06	0.00402102	0.00260858	0.000482766	0.000920202	0.000220145	0.000620536	0.0577435	1.60396e-06	0.000155692	2.25106
5.10575	5.77926	3.78509	0.439774	0.0608719	0.00200398	0.110757	0.0436871	0.59856	0.527769	0.100186	0.102946	0.102275	0.0743785	0.086643	0.0101281	0.0278459	0.0100197	0.0260769	0.046902	0.0324311	0.0168684	0.0103054	0.0125688	0.0019376	0.0183679	0.00170484	0.00206676	2.6066e-06	0.00371437	0.0024499	0.000453399	0.000916267	0.000212727	0.000653264	0.0714415	1.72211e-06	0.000192288	2.44755
5.95286	5.49844	3.77501	0.462208	0.0662542	0.00279545	0.120625	0.0484181	0.578351	0.519129	0.106048	0.111039	0.108965	0.0808576	0.0899522	0.00952428	0.0285411	0.0104592	0.0279165	0.0505287	0.0375318	0.0190369	0.0118528	0.0138967	0.0023048	0.0199223	0.00196389	0.0023583	3.59939e-06	0.00341543	0.0022933	0.000424416	0.000905495	0.000204882	0.000677036	0.0869007	1.82964e-06	0.000234692	2.64996
6.94053	5.21281	3.76233	0.483574	0.0712996	0.00383531	0.130674	0.0533941	0.557569	0.510214	0.111801	0.119373	0.115681	0.0876729	0.0929619	0.00894188	0.0292368	0.010908	0.0297609	0.05423	0.0431464	0.0213209	0.0135262	0.0152239	0.00271588	0.0215374	0.0022472	0.00267137	4.91138e-06	0.00312531	0.00213932	0.000395921	0.00088838	0.00019667	0.000691842	0.104095	1.92515e-06	0.000283384	2.85791
8.09206	4.92321	3.74682	0.503794	0.0759699	0.00518378	0.140883	0.0586163	0.536219	0.501032	0.117415	0.127931	0.1224	0.0948373	0.0956664	0.00839782	0.0299323	0.0113666	0.0316038	0.0580001	0.049296	0.0237089	0.0153245	0.0165485	0.0031729	0.0232147	0.00255577	0.00300571	6.63011e-06	0.00284496	0.00198848	0.000368006	0.000865461	0.000188153	0.000697962	0.122967	2.00763e-06	0.000338839	3.07099
9.43465	4.63065	3.72825	0.52278	0.0802388	0.00691231	0.151228	0.0640843	0.514313	0.491596	0.122856	0.136693	0.129096	0.102363	0.0980617	0.00790099	0.0306263	0.0118355	0.0334378	0.061831	0.0559992	0.0261866	0.0172445	0.0178702	0.00367757	0.0249553	0.0028906	0.00336081	8.86437e-06	0.00257491	0.00184112	0.000340733	0.000837344	0.000179392	0.000695956	0.143421	2.07637e-06	0.000401518	3.28863
11	4.33623	3.70638	0.540456	0.0840905	0.00910497	0.161682	0.0697966	0.491859	0.481917	0.12809	0.145632	0.135741	0.11026	0.100146	0.00745465	0.0313176	0.0123152	0.0352551	0.0657139	0.0632713	0.0287376	0.0192814	0.0191903	0.00423116	0.0267604	0.00325266	0.00373592	1.17488e-05	0.00231599	0.00169767	0.000314185	0.000804597	0.000170449	0.000686417	0.165328	2.131e-06	0.000471868	3.51016
12.8251	4.04106	3.68097	0.556771	0.0875225	0.0118595	0.172222	0.0757531	0.468856	0.472008	0.133086	0.154722	0.14231	0.118545	0.101921	0.00705803	0.032005	0.0128065	0.0370483	0.069641	0.0711254	0.0313446	0.0214286	0.0205119	0.00483439	0.0286321	0.00364303	0.0041302	1.54487e-05	0.00206927	0.0015587	0.000288465	0.000767798	0.000161391	0.000669995	0.188523	2.17154e-06	0.00055032	3.73497
14.9529	3.7464	3.65177	0.571669	0.0905356	0.0152894	0.18282	0.0819517	0.445316	0.46188	0.137813	0.163926	0.148775	0.12723	0.103391	0.00670832	0.0326872	0.0133101	0.0388092	0.0736022	0.0795702	0.0339877	0.0236768	0.0218384	0.00548726	0.0305723	0.00406281	0.00454252	2.0168e-05	0.00183543	0.00142456	0.000263641	0.000727589	0.000152282	0.000647492	0.212803	2.19828e-06	0.000637281	3.96227
17.4338	3.45358	3.61856	0.585111	0.0931358	0.0195255	0.193446	0.0883907	0.421239	0.451555	0.142238	0.173203	0.15511	0.13633	0.104565	0.00640241	0.0333633	0.0138266	0.0405294	0.0775873	0.0886102	0.0366458	0.0260143	0.0231735	0.00618885	0.0325836	0.0045132	0.00497154	2.61555e-05	0.00161583	0.00129594	0.000239837	0.000684615	0.000143202	0.00061967	0.237928	2.21178e-06	0.000733147	4.19126
20.3263	3.16422	3.58113	0.597041	0.0953297	0.0247185	0.204059	0.0950638	0.396685	0.441041	0.146326	0.1825	0.161281	0.145855	0.10545	0.00613535	0.0340315	0.0143569	0.0421985	0.0815815	0.0982411	0.0392944	0.0284252	0.0245201	0.006937	0.0346676	0.00499535	0.00541548	3.37183e-05	0.00140988	0.00117261	0.000217013	0.000639527	0.000134184	0.000587501	0.263602	2.21278e-06	0.000838267	4.42087
23.6988	2.87997	3.53928	0.607426	0.0971294	0.0310391	0.214621	0.101965	0.371707	0.430361	0.150044	0.191754	0.167256	0.155817	0.106056	0.00590296	0.0346905	0.0149018	0.0438067	0.08557	0.108452	0.0419082	0.0308907	0.0258813	0.00772821	0.0368266	0.00551053	0.00587233	4.32312e-05	0.00121841	0.00105501	0.000195248	0.000592993	0.000125293	0.000551848	0.289489	2.20228e-06	0.000952961	4.65001

## Sheet: Matrix of Reactions
		Reactions color scheme
		Alcohol → Aldehyde + H2
		2 Aldehyde → Alkenal + H2O
		Alkenal + H2 → Aldehyde
		Alcohol + Aldehyde → Ester + H2
		2 Aldehyde → Ketone + CO+ H2
	Keq							3.18743	0.883812	5.41418	9.11109	30.4712	25.1492	1.24124		0.385434	1	0.872374			12.9056	10.4477	7.96866	54.2054	5.70813											0.405749		0.872374
		R1	R2	R3	R4	R5	R6	R7	R8	R9	R10	R11	R12	R13	R14	R15	R16	R17	R18	R19	R20	R21	R22	R23	R24	R25	R26	R27	R28	R29	R30	R31	R32	R33	R34	R35	R36	R37			Compund	CN	MW (g/mol)	Gf (J/mol) @ 325 °C	ρ/MW (mol/L)
		0	0	0	0	0	0	-1	0	-1	0	-1	0	0	0	0	0	0	0	0	0	-1	0	0	0	0	0	0	0	0	0	0	0	0	0	0	0	0	%E		ethanol	2	46.07	-109606	17.16	%E
		0	0	0	0	0	0	0	-1	0	-1	0	-1	0	0	0	0	0	0	0	-1	0	0	-1	0	0	0	0	0	0	0	0	0	0	0	0	0	0	%B		1-butanol	4	74.12	-41189	10.9	%B
		0	0	0	0	0	0	0	0	0	0	0	0	-1	0	0	0	0	0	0	0	0	-1	0	0	0	0	0	0	0	0	0	0	0	0	0	0	0	%H		1-hexanol	6	102.18	27290	8.02	%H
		0	0	0	0	0	0	0	0	0	0	0	0	0	0	-1	0	0	0	0	0	0	0	0	0	0	0	0	0	0	0	0	0	0	0	0	0	0	%O		1-octanol	8	130.23	95972	6.37	%O
		0	0	0	0	0	0	0	0	0	0	0	0	0	0	0	0	0	0	0	0	0	0	0	0	0	0	0	0	0	0	0	0	0	0	-1	0	0	%D		1-decanol	10	158.28	164553	5.21	%D
		0	0	0	0	0	0	0	0	0	0	0	0	0	0	0	-1	0	0	0	0	0	0	0	-1	0	0	0	0	0	0	0	0	0	0	0	0	0	%2EB		2-ethylbutanol	6	102.18	33014.9	8.18	%2EB
		0	0	0	0	0	0	0	0	0	0	0	0	0	0	0	0	-1	0	0	0	0	0	0	0	0	0	0	0	0	0	0	0	0	0	0	0	0	%2EH		2-ethylhexanol	8	130.23	91945	6.4	%2EH
		-2	-1	-1	-1	-1	-1	1	0	-1	-1	0	0	0	0	0	0	0	-2	-1	0	0	-1	0	-1	0	0	-1	0	0	0	0	0	0	0	0	0	0	%A		acetaldehyde	2	44.05	-111917	17.73	%A
		0	-1	-1	0	0	0	0	1	0	0	-1	-1	0	-2	0	0	0	0	-1	0	0	0	0	0	-2	-1	0	0	1	0	0	0	0	0	0	0	0	%Bal		butyraldehyde	4	72.11	-37121.8	11.13	%Bal
		0	0	0	0	0	0	0	0	1	0	0	0	0	0	0	0	0	0	0	0	0	0	0	0	0	0	0	0	0	0	0	0	0	0	0	0	0	%EA		ethyl acetate	4	88.11	-226470	10.21	%EA
		0	0	0	0	0	0	0	0	0	1	0	0	0	0	0	0	0	0	0	0	0	0	0	0	0	0	0	0	0	0	0	0	0	0	0	0	0	%BA		butyl acetate	6	116.16	-160641	7.58	%BA
		0	0	0	0	0	0	0	0	0	0	1	0	0	0	0	0	0	0	0	0	0	0	0	0	0	0	0	0	0	0	0	0	0	0	0	0	0	%EB		ethyl butanoate	6	116.16	-160266	7.57	%EB
		0	0	0	0	0	0	0	0	0	0	0	1	0	0	0	0	0	0	0	0	0	0	0	0	0	0	0	0	0	0	0	0	0	0	0	0	0	%BB		Butyl butanoate	8	144.21	-90894.9	6.03	%BB
		0	0	0	-1	-1	0	0	0	0	0	0	0	1	0	0	0	0	0	0	-1	-1	0	0	0	0	-1	-1	-2	0	1	0	0	0	0	0	0	0	%He		hexanal	6	100.16	29668.3	8.21	%He
		0	0	0	0	0	-1	0	0	0	0	0	0	0	0	1	0	0	0	0	0	0	0	-1	0	0	0	0	0	0	0	0	1	0	0	0	0	0	%Oc		octanal	8	128.21	104166	6.42	%Oc
		0	0	0	0	0	0	0	0	0	0	0	0	0	0	0	1	0	0	0	0	0	0	0	0	0	0	0	0	0	0	1	0	0	0	0	0	0	%2EBa		2-ethylbutanal	6	100.16	30746.5	8.08	%2EBa
		0	0	0	0	0	0	0	0	0	0	0	0	0	0	0	0	1	0	0	0	0	0	0	0	0	0	0	0	0	0	0	0	1	0	0	0	0	%2EHa		2-ethylhexanal	8	128.21	96077	6.4	%2EHa
		0	0	0	0	0	0	0	0	0	0	0	0	0	0	0	0	0	1	0	0	0	0	0	0	0	0	0	0	0	0	0	0	0	0	0	0	0	%Ac		acetone	3	58.08	0	13.63	%Ac
		0	0	0	0	0	0	0	0	0	0	0	0	0	0	0	0	0	0	1	0	0	0	0	0	0	0	0	0	0	0	0	0	0	0	0	0	0	%2Po		2-pentanone	5	86.13	0	9.39	%2Po
		0	0	0	0	0	0	0	0	0	0	0	0	0	0	0	0	0	0	0	1	0	0	0	0	0	0	0	0	0	0	0	0	0	0	0	0	0	%BH		butyl hexanoate	10	172.26	-20787	5.03	%BH
		0	0	0	0	0	0	0	0	0	0	0	0	0	0	0	0	0	0	0	0	1	0	0	0	0	0	0	0	0	0	0	0	0	0	0	0	0	%EH		ethyl hexanoate	8	144.21	-88153	5.6	%EH
		0	0	0	0	0	0	0	0	0	0	0	0	0	0	0	0	0	0	0	0	0	1	0	0	0	0	0	0	0	0	0	0	0	0	0	0	0	%HA		hexyl acetate	8	144.21	-91496.1	6.01	%HA
		0	0	0	0	0	0	0	0	0	0	0	0	0	0	0	0	0	0	0	0	0	0	1	0	0	0	0	0	0	0	0	0	0	0	0	0	0	%BO		Butyl octanoate	12	200.32	46574	4.34	%BO
		0	0	0	0	0	0	0	0	0	0	0	0	0	0	0	0	0	0	0	0	0	0	0	1	0	0	0	0	0	0	0	0	0	0	0	0	0	%2EBAc		2-ethylbutyl acetate	8	144.21	-84112	5.68	%2EBAc
		0	0	0	0	0	0	0	0	0	0	0	0	0	0	0	0	0	0	0	0	0	0	0	0	1	0	0	0	0	0	0	0	0	0	0	0	0	%4-Ho		4-heptanone	7	114.19	0	7.18	%4-Ho
		0	0	0	0	0	0	0	0	0	0	0	0	0	0	0	0	0	0	0	0	0	0	0	0	0	1	0	0	0	0	0	0	0	0	0	0	0	%4No		4-nonanone	9	142.24	0	5.76	%4No
		0	0	0	0	0	0	0	0	0	0	0	0	0	0	0	0	0	0	0	0	0	0	0	0	0	0	1	0	0	0	0	0	0	0	0	0	0	%2Ho		2-heptanone	7	114.19	0	7.18	%2Ho
		0	0	0	0	0	0	0	0	0	0	0	0	0	0	0	0	0	0	0	0	0	0	0	0	0	0	0	0	0	0	0	0	0	0	0	0	-1	%2BO		2-butyl-1-octanol	12	186.34	226672	4.4	%2BO
		1	0	0	0	0	0	0	0	0	0	0	0	0	0	0	0	0	0	0	0	0	0	0	0	0	0	0	0	-1	0	0	0	0	0	0	0	0	%2Bal=		2-butenal	4	70.094	0	11.4501	%2Bal=
		0	1	0	0	0	0	0	0	0	0	0	0	0	0	0	0	0	0	0	0	0	0	0	0	0	0	0	0	0	-1	0	0	0	0	0	0	0	%2He=		2-hexenal	6	98.144	0	8.37864	%2He=
		0	0	1	0	0	0	0	0	0	0	0	0	0	0	0	0	0	0	0	0	0	0	0	0	0	0	0	0	0	0	-1	0	0	0	0	0	0	%2EBa=		2-ethylbutenal	6	98.144	0	8.24597	%2EBa=
		0	0	0	1	0	0	0	0	0	0	0	0	0	0	0	0	0	0	0	0	0	0	0	0	0	0	0	0	0	0	0	-1	0	0	0	0	0	%Oc=		2-octenal	8	126.194	0	6.52256	%Oc=
		0	0	0	0	1	0	0	0	0	0	0	0	0	1	0	0	0	0	0	0	0	0	0	0	0	0	0	0	0	0	0	0	-1	0	0	0	0	%2EHa=		2-ethylhexenal	8	126.194	0	6.50224	%2EHa=
		0	0	0	0	0	1	0	0	0	0	0	0	0	0	0	0	0	0	0	0	0	0	0	0	0	0	0	0	0	0	0	0	0	-1	0	0	0	%De=		2-decenal	10	154.248	0	5.34619	%De=
		0	0	0	0	0	0	0	0	0	0	0	0	0	0	0	0	0	0	0	0	0	0	0	0	0	0	0	0	0	0	0	0	0	1	1	0	0	%De		decanal	10	156.264	172491	5.27722	%De
		0	0	0	0	0	0	0	0	0	0	0	0	0	0	0	0	0	0	0	0	0	0	0	0	0	0	0	1	0	0	0	0	0	0	0	-1	0	%2BOc=		2-butyl-2-octenal	12	182.308	0	4.49731	%2BOc=
		0	0	0	0	0	0	0	0	0	0	0	0	0	0	0	0	0	0	0	0	0	0	0	0	0	0	0	0	0	0	0	0	0	0	0	1	1	%2BOc		2-butyloctanal	12	184.324	230804	4.44812	%2BOc
		1	1	1	1	1	1	0	0	0	0	0	0	0	1	0	0	0	0	0	0	0	0	0	0	0	0	0	1	0	0	0	0	0	0	0	0	0	%H2O		water	0	18.02	0	55.31	%H2O
		0	0	0	0	0	0	0	0	0	0	0	0	0	0	0	0	0	1	1	0	0	0	0	0	1	1	1	0	0	0	0	0	0	0	0	0	0	%CO		CO	1	28.01	0	0	%CO
		0	0	0	0	0	0	1	1	1	1	1	1	1	0	1	1	1	1	1	1	1	1	1	1	1	1	1	0	-1	-1	-1	-1	-1	-1	1	-1	1	%H2		Hydrogen	0	2.02	-3453	0	%H2
	Rxn. Balance	0.014	0.004	0.004	0.004	0.004	0.008	-3.10862e-15	0.01	0.01	0.01	-1.02141e-14	-1.02141e-14	-1.02141e-14	-0.006	1.82077e-14	-1.02141e-14	1.82077e-14	0.01	4.44089e-16	-1.02141e-14	1.82077e-14	-1.02141e-14	0.01	-1.02141e-14	4.44089e-16	2.88658e-14	0.01	0.008	-0.004	-0.004	-0.004	-0.004	-0.004	-0.004	0.004	-0.004	0.004
	Δn	0	0	0	0	0	0	1	1	0	0	0	0	1	0	1	1	1	1	1	0	0	0	0	0	1	1	1	0	-1	-1	-1	-1	-1	-1	1	-1	1

## Sheet: Thermochemistry
			Thermochemistry information source:					Aspen Properties
							JANAF	https://janaf.nist.gov/
							NIST	https://webbook.nist.gov/
								CRC Handbook of Chemistry and Physics 95th edition
								Chemical properties handbook; McGraw-Hill Handbook, Carl L. Yaws
								Predicted with Joback-Reid Group contribution method in Aspen Properties							598.15
									Cp (J mol-1 K-1)						Calculated		From Aspen	Joback-Reid		Fit for Cp=aT+b
	Compound	Formule	#C	#H	#O	ΔH°f (J mol-1)	S° (J mol-1 K-1)	ΔG°f (J mol-1)	298.15	300	400	500	600		ΔH°f (J mol-1)	ΔG°f (J mol-1)	ΔG°f (J mol-1)	ΔG°f (J mol-1)		a=slope	b=intercept	r²
	Ethanol	C2H6O1	2	6	1	-234950		-167883	65.1075	65.4069	81.6446	95.9259	108.049		-208749	-109534	-109606			0.144081	22.7662	0.996575
						-234000	281.622	-167074	65.21	65.49	81.22	95.78	108.24
	Butanol	C4H10O1	4	10	1	-275100		-150733	107.863	108.445	138.931	164.602	185.975		-230505	-41017.3	-41189			0.262538	30.9944	0.994904
						-277000	361.98	-152685	108.03	108.58	138.16	164.42	186.38
	Hexanol	C6H14O1	6	14	1	-316200		-133933	153.109	153.937	197.59	234.525	264.937		-252736	27533.8	27290			0.376083	43.0039	0.994775
						-316000	439.7	-133510	156.973	157.753	197.573	232.832	263.658
	Octanol					-357300		-117033	198.32	199.394	256.241	304.429	343.834		-274978	96289	95972			0.489562	55.0088	0.994659
						-356000		-117360	203.589	204.604	256.391	302.13	341.956
	Decanol					-398500		-100233	243.537	244.857	314.899	374.364	422.785		-297312	164942	164553			0.603195	66.9699	0.994599
						-395000		-105520	250.212	251.463	315.232	371.465	420.305
	2-ethylbutanol					-319200		-132633	155.15	155.831	195.73	232.933	263.774		-255874	18131.3	33014.9	24581		0.364749	47.6241	0.997399
						-326100		-140110	154.032	154.888	197.422	233.339	263.733
	2-Ethylhexanol					-363000		-117433	199.669	200.658	255.206	303.056	342.016		-280867	101218	100962	91945		0.478854	59.1797	0.995567
						-367500		-118880	199.834	200.89	254.166	300.441	340.429
	Acetaldehyde	C2H4O1	2	4	1	-171000		-137833	54.7323	54.8992	65.514	76.5176	86.127		-149835	-111921	-111917			0.104927	23.5273	0.99944
						-170700	263.84	-137434	55.32	55.51	66.28	76.68	85.94									0.999069
	Butyraldehyde	C4H8O1	4	8	1	-206200		-114833	102.833	103.179	125.15	148.09	168.364		-165471	-37135.7	-37121.8			0.218821	37.6993	0.999573
						-207000	344.8	-116525	106.349	106.702	126.457	146.707	166.419
	Ethyl acetate	C4H8O2	4	8	2	-444500		-328033	113.63	113.995	137.448	161.836	182.662		-399949	-226476	-226470			0.231046	44.9602	0.99923
						-444982	362.75	-329277	113.64	113.97	137.4	161.92	182.63
	Butyl acetate					-485600		-312633	152.812	153.578	196.455	233.206	261.677		-422593	-160409	-160641			0.367422	45.3643	0.993586
						-485300		-312300	159.088	159.734	195.235	229.813	261.068
	Ethyl butyrate					-485500		-312233	155.9	156.709	199.311	234.445	262.479		-421896	-159998	-160266			0.35922	51.0293	0.993077
						-485000		-312200	157.323	158.158	199.431	233.743	262.092
	Butyl butyrate					-524900		-294133	201.283	202.337	258.057	304.12	340.925		-442470	-90548.2	-90894.9			0.470607	63.8638	0.993201
						-524900		-294100	215.889	216.936	270.09	316.721	357.25
	Hexanal					-248000		-99232.6	148.156	148.775	183.929	216.406	243.991		-188775	29777.8	29668.3			0.32134	53.4073	0.997672
						-248150		-110120	153.121	153.698	185.075	215.796	244.689
	Octanal	C8H16O1	8	16	1	-290200		-80032.6	192.773	193.558	241.207	287.889	326.984		-211804	104243	104166			0.450096	59.6084	0.998394
						-291900		-83300	215.152	216.209	278.666	352.584	439.792
	2-Ethylbutanal					-253186		-101212	147.04	147.802	185.864	219.349	248.932		-193330	30921.5	30746.5	28713		0.340943	46.7275	0.997359
	2-Ethylhexanal					-299600		-104663	183.228	184.115	234.819	281.004	319.149		-223554	65247.3	65064.3	96077		0.456642	48.8424	0.996832
						-299600		-91490	183.084	184.127	236.193	280.59	318.415
	Butyl hexanoate					-567300		-32.63	246.99	248.259	312.371	369.581	419.895		-466524	535794	535521	-20787		0.578614	76.6156	0.997588
	Ethyl hexanoate					-526140		-32.63	200.515	201.547	253.477	299.6	340.22		-444419	500977	500749	-88153		0.467503	62.8936	0.997512
						-528000
	Hexyl acetate					-526300		-295333	198.265	199.271	254.331	301.539	339.421		-444663	-91204.7	-91496.1			0.475398	59.0742	0.994535
						-526300		-295300	197.976	199.109	254.78	300.858	339.137
	Butyl octanoate					-608460		-32.63	293.463	294.97	371.274	439.548	499.567		-488630	570612	570291	46574		0.689704	90.344	0.997637
	Decanal					-331700		-63522.6	237.633	238.653	299.729	357.964	405.934		-234469	172639	172491	153838		0.565205	70.8053	0.997692
						-330910		-66530	259.033	259.769	303.288	350.728	397.814
	Hydrogen					0		-32.63	28.7755	28.7872	29.2056	29.3098	29.3234		8740.58	-3444.66	-3454.64			0.00192733	28.2715	0.83013
						0	130.68	0	28.836	28.849	29.181	29.26	29.327
	C (ref)						5.74
	O2 (ref)						205.147
